# Supplementary material for: Celecoxib analogues disrupt Akt signaling, which is commonly activated in primary breast tumours
Source: PubMed Central journal article supplement (PMC1242152; doi:10.1186/bcr1294), 2005-08-01
Supplement: bcr1294-S1.pdf [file bcr1294-S1.pdf]

**Table 1 supplemental. Description of the patients and their tumors.** The breast tumor tissue microarrays (TMA) were constructed from archival material collected between 1974-1995. Tissues for formal fixed and paraffin embedded. A total of 438 tumors were evaluated immunohistochemically for P-Akt. Each of the samples were represented on the TMA in duplicate and the concordance in scoring was >90%. Abbreviations: DCIS, ductal carcinoma in situ; IDC, infiltrating ductal carcinoma; ILC, infiltrating lobular carcinoma; NOS, not otherwise specified

| Characteristics          |                   | Data       |
|--------------------------|-------------------|------------|
| Diagnostic Age, yr       | Mean              | 61.01      |
|                          | Median            | 63.07      |
|                          | Range             | 59.03      |
| Lymph Node Status, n (%) | Negative          | 266 (60.7) |
|                          | Positive          | 126 (28.8) |
|                          | Unknown           | 46 (10.5)  |
| ER status, n (%)         | Negative          | 93 (21.2)  |
|                          | Positive          | 216 (49.3) |
|                          | Unknown           | 129 (29.4) |
| Tumor Grade, n (%)       | 1                 | 94 (21.5)  |
|                          | 2                 | 236 (53.9) |
|                          | 3                 | 108 (24.6) |
| Tumor Size, n (%)        | <= 5mm            | 4 (2.2)    |
|                          | <= 1cm            | 64 (14.6)  |
|                          | <= 2cm            | 142 (32.4) |
|                          | > 2cm             | 147 (33.6) |
|                          | Unknown           | 81         |
| Histology, n (%)         | in situ carcinoma | 16 (3.6)   |
|                          | IDC, NOS          | 353 (80.5) |
|                          | IDC, variants     | 24 (5.5)   |
|                          | ILC               | 43 (10)    |
|                          | IDC and ILC       | 2 (0.4)    |
| Survival, yr             | Mean              | 10.21      |
|                          | Median            | 10.76      |
|                          | Range             | 26.62      |
| Total Follow-up, yr      | Mean              | 14.47      |
|                          | Median            | 15.4       |
|                          | Range             | 20.34      |
